# Supplementary material for: Family-Based Haplotype Estimation and Allele Dosage Correction for Polyploids Using Short Sequence Reads
Source: PubMed Central journal article supplement (PMC6477055; doi:10.3389/fgene.2019.00335), 2019-04-16

Figure S1

# Reconstruction rate in parents

- PopPoly
- TriPoly
- H-PoP
- SDhaP

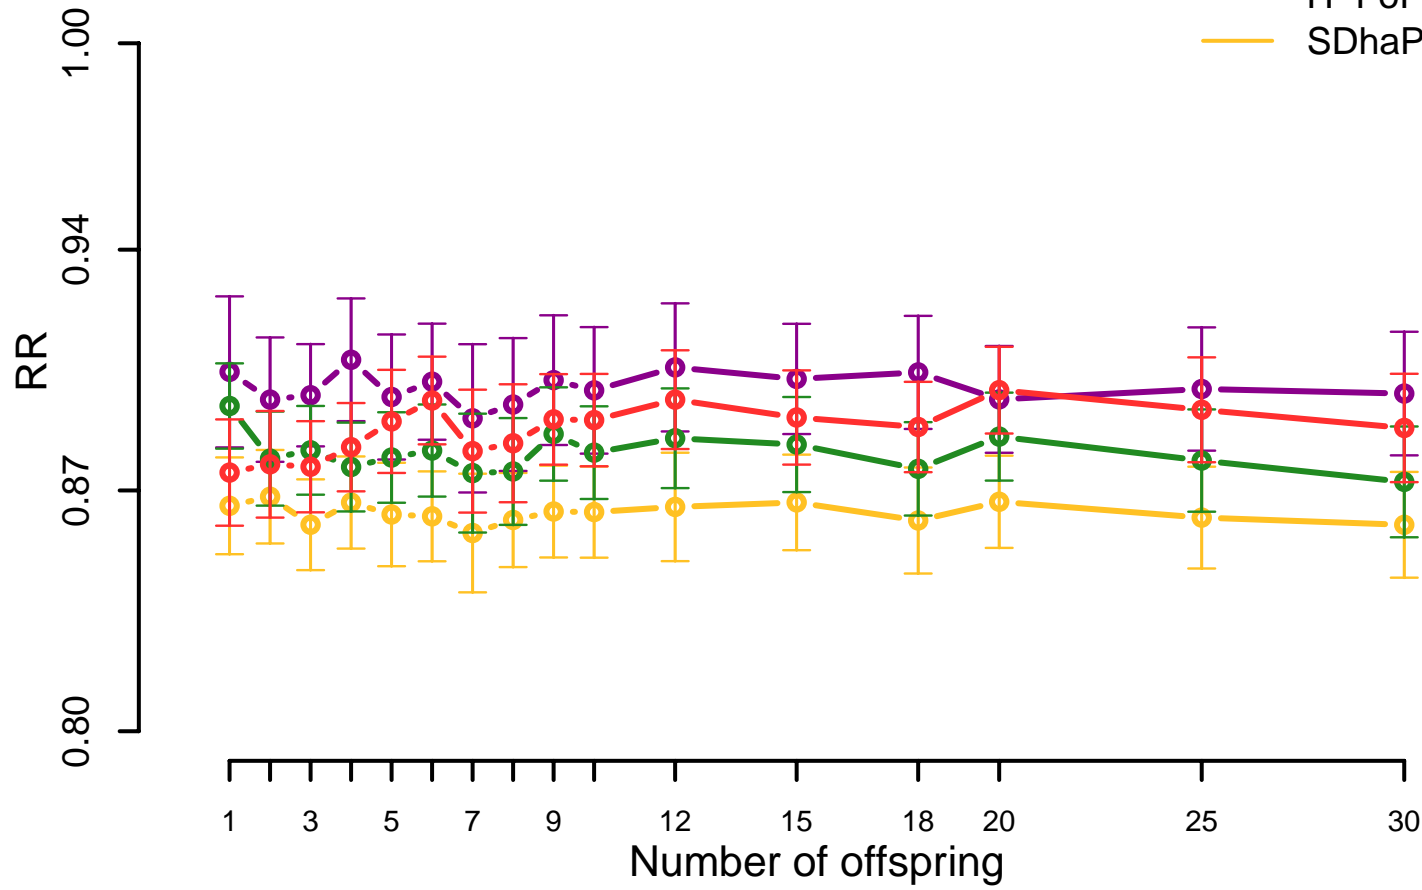

Figure S2

# Pairwise-phasing accuracy rate in parents

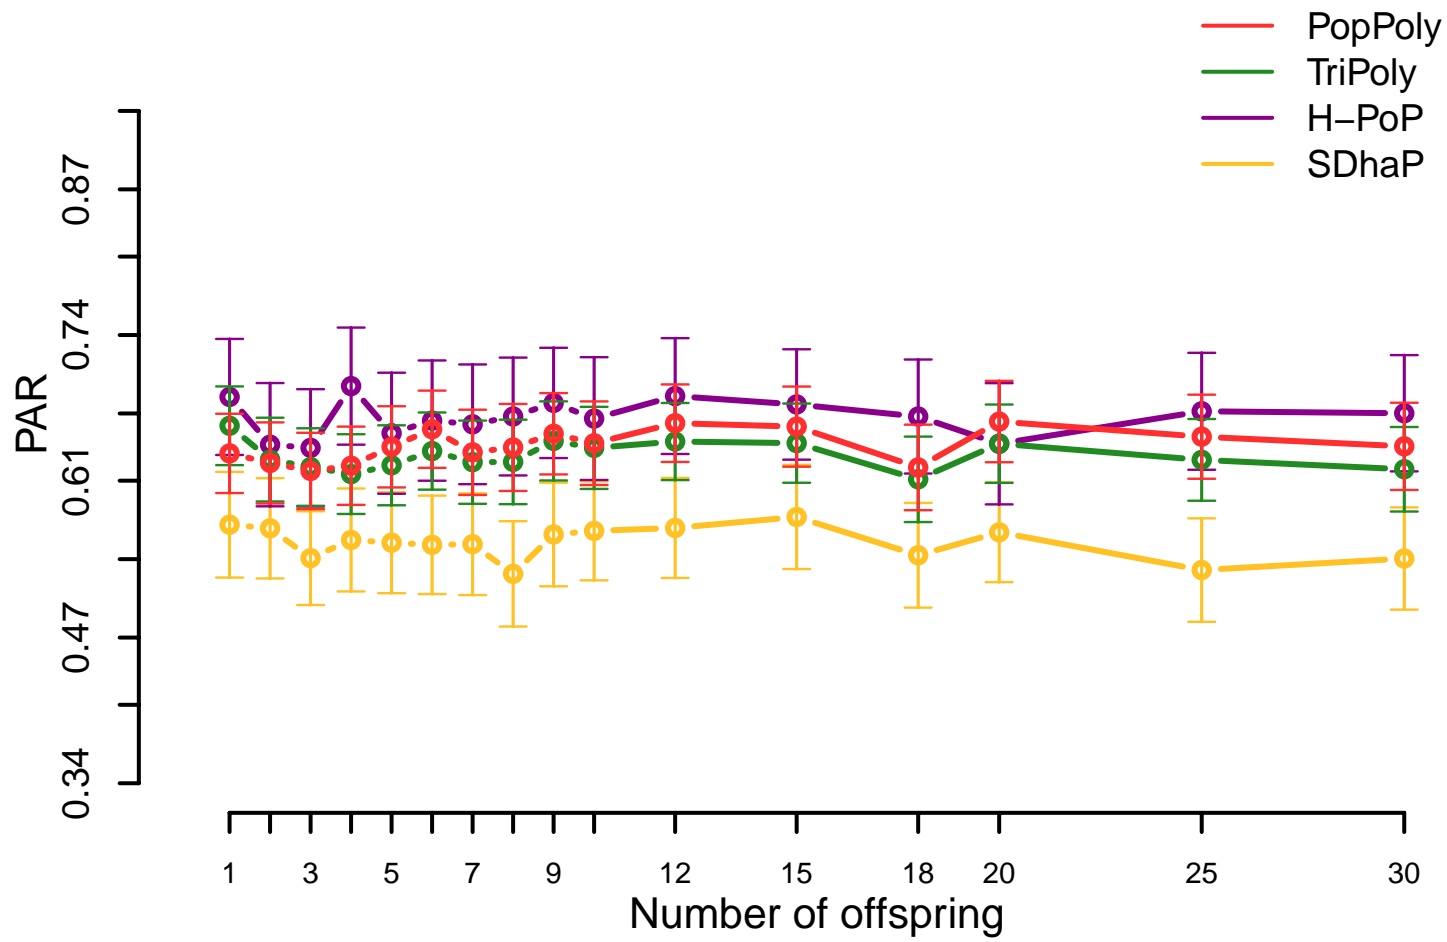

Figure S3

# Pairwise-phasing accuracy rate in population with 2 offspring

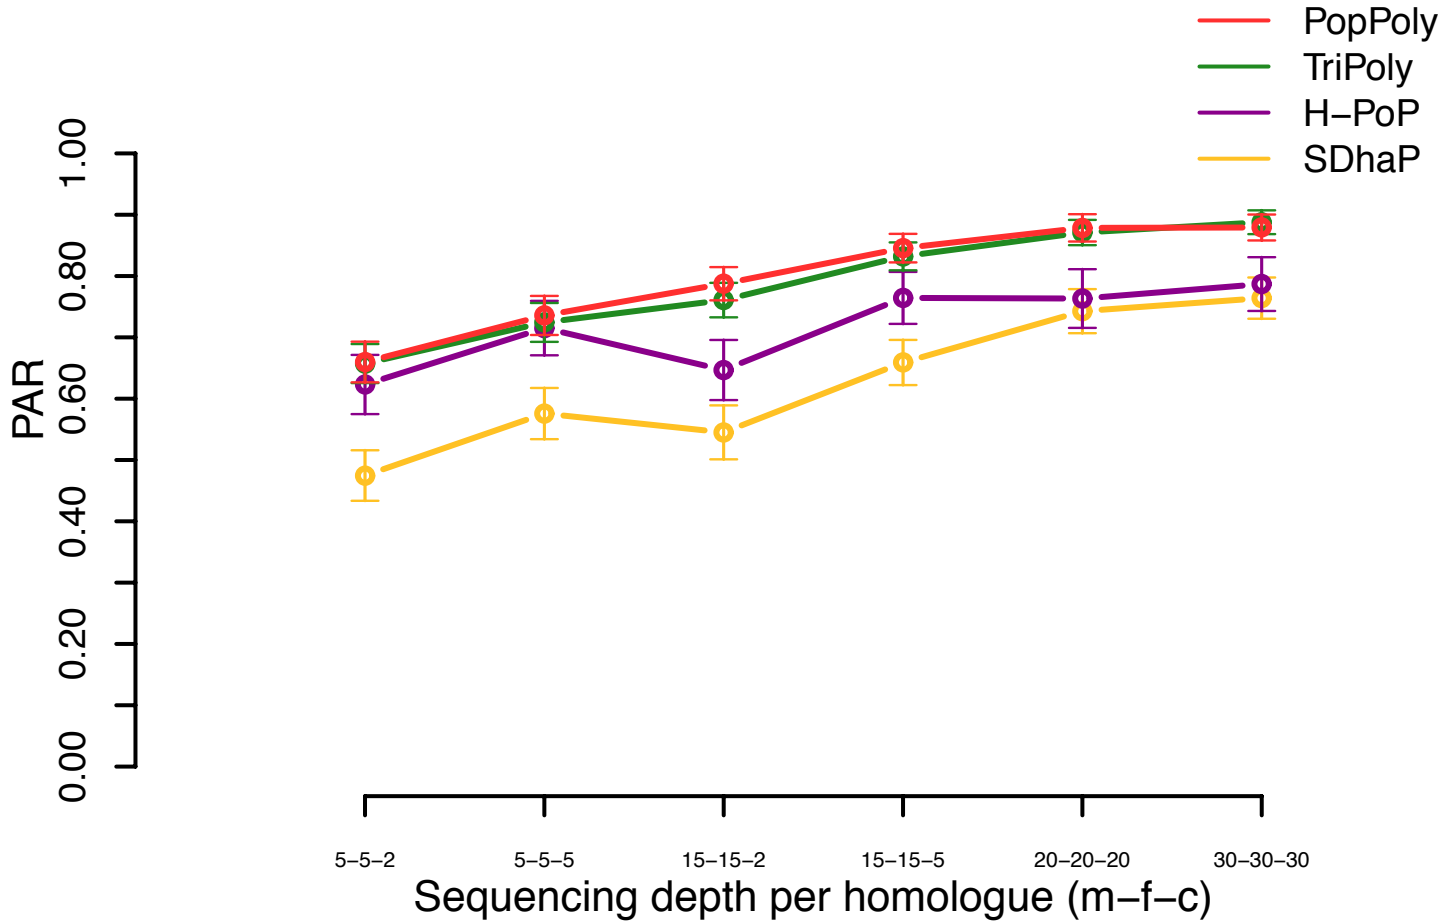

Figure S4

# Pairwise-phasing accuracy rate in population with 6 offspring

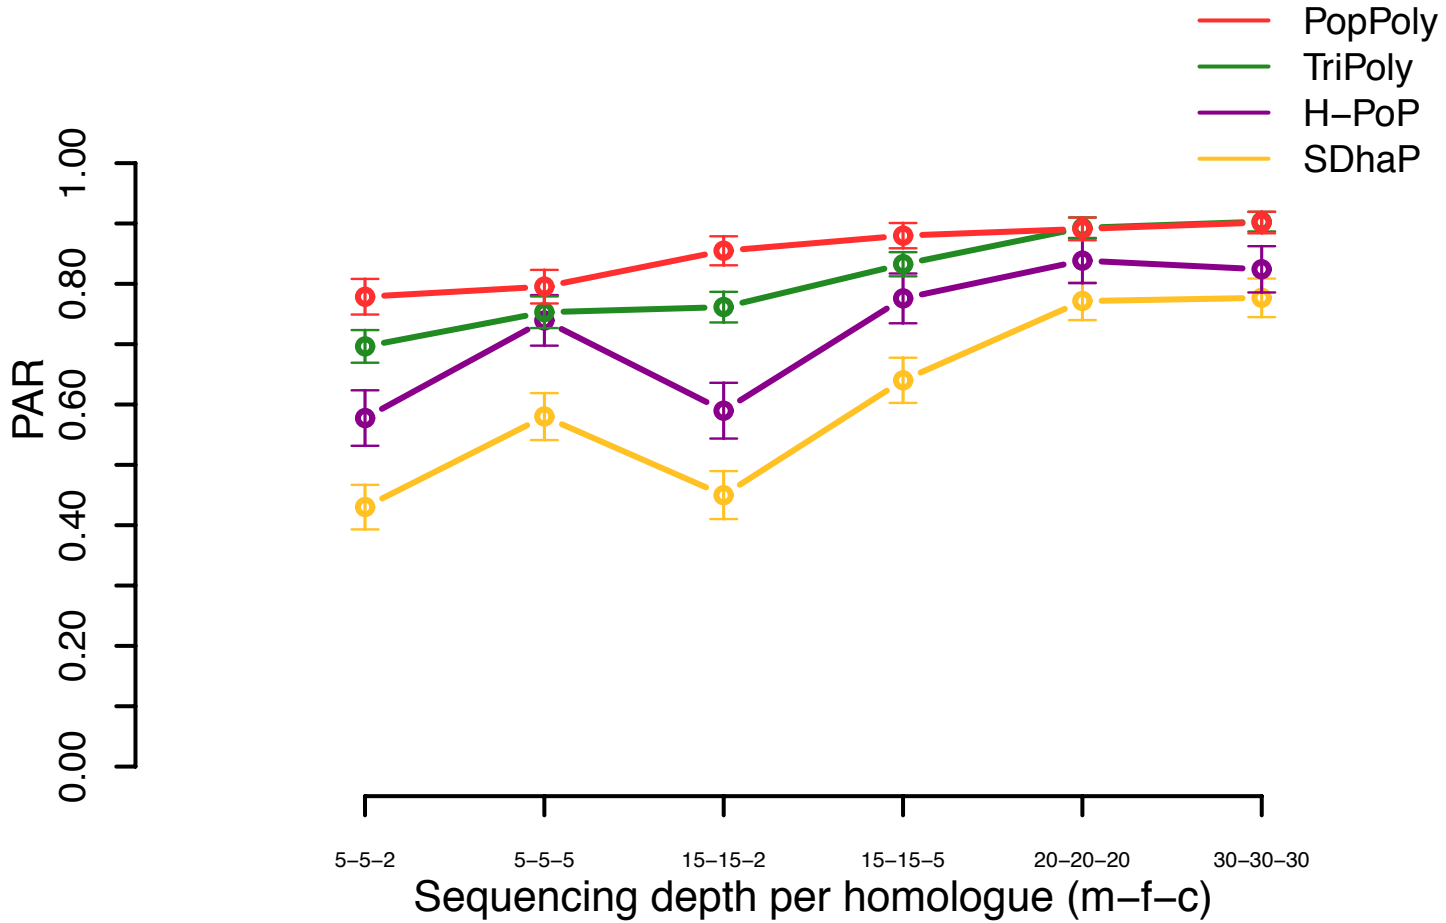

Figure S5 Pairwise-phasing accuracy rate in population with 10 offspring

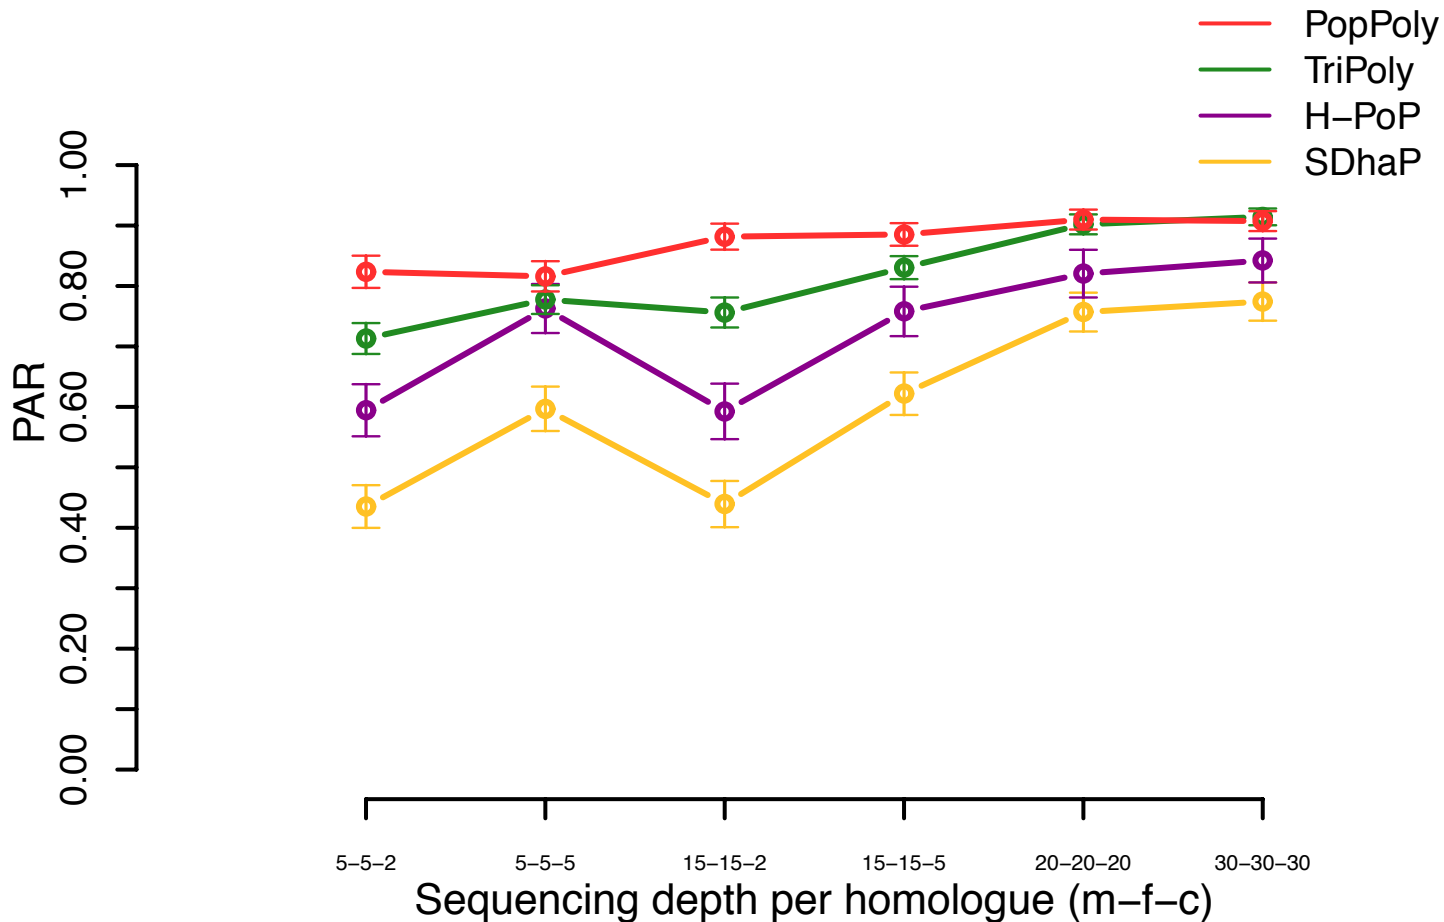

Figure S6

# Reconstruction rate in population with 2 offspring

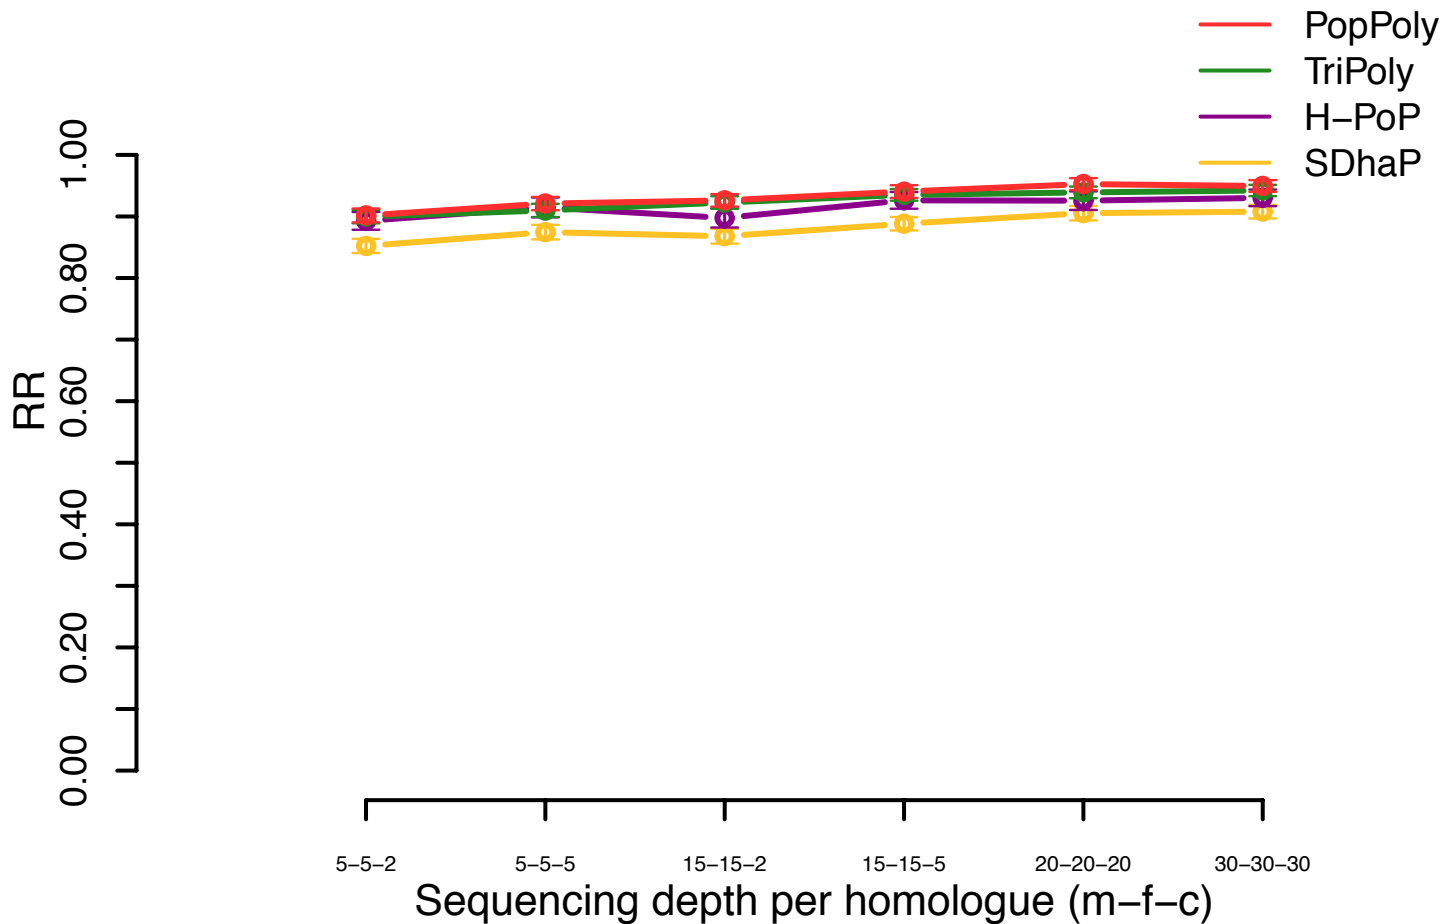

Figure S7

# Reconstruction rate in population with 6 offspring

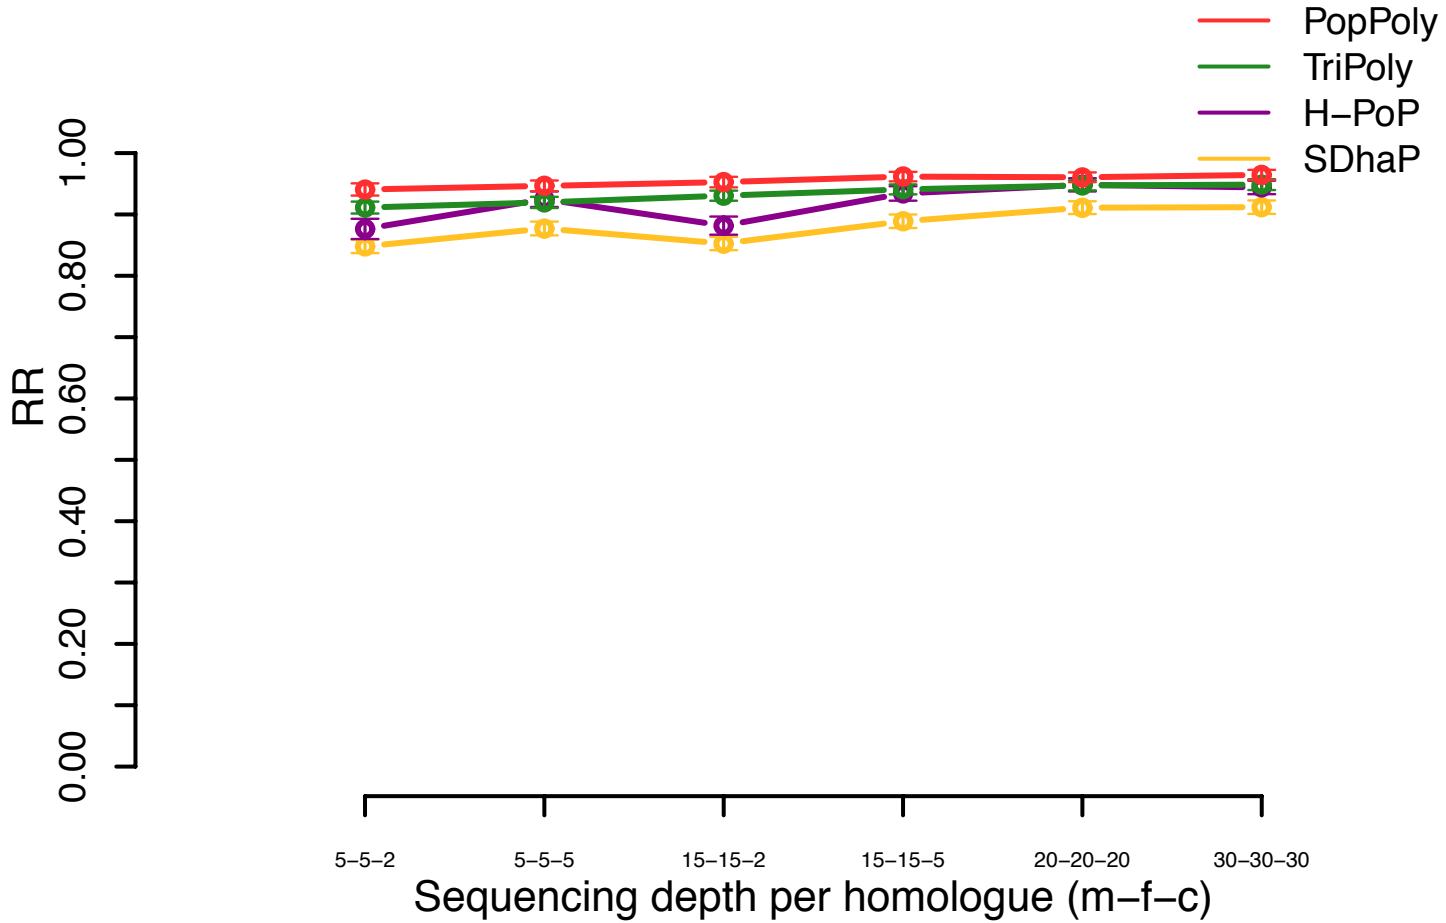

Figure S8

# Reconstruction rate in population with 10 offspring

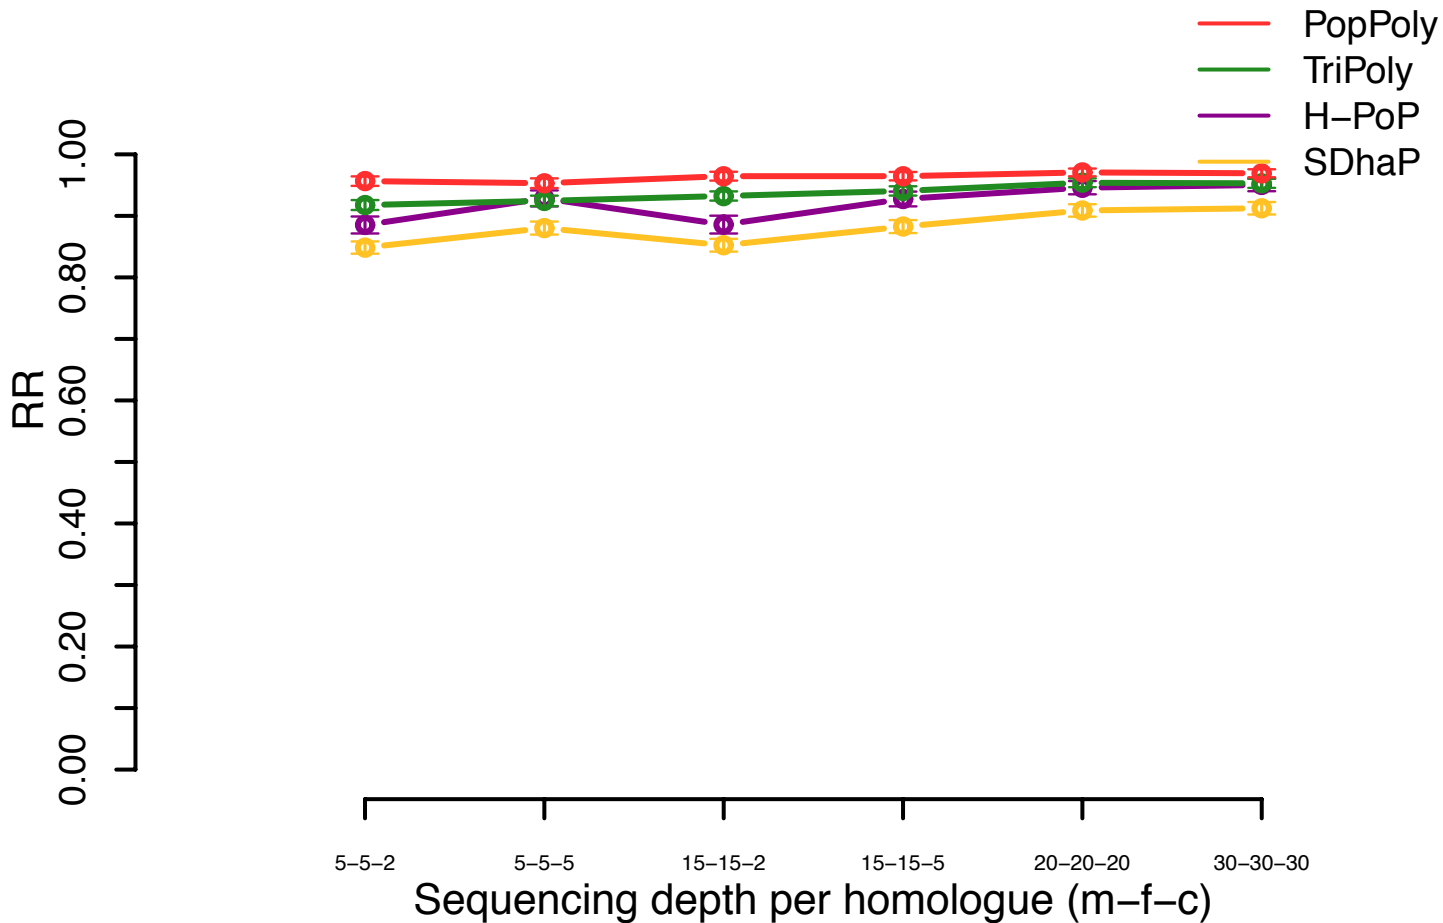



Figure S9

## SNP missing rate in population with 2 offspring

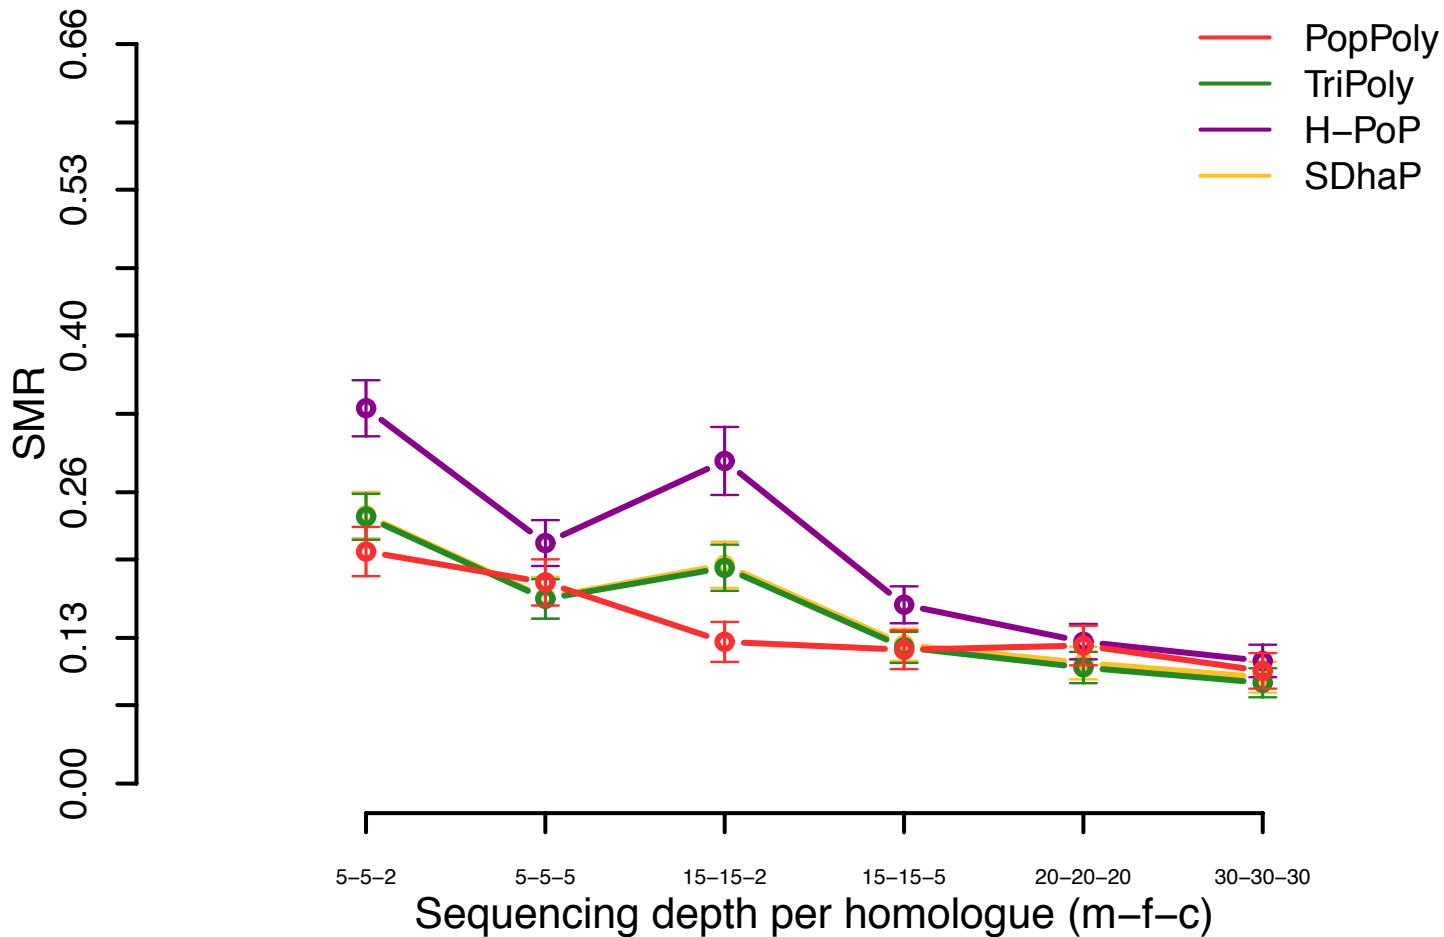

Figure S10

## SNP missing rate in population with 6 offspring

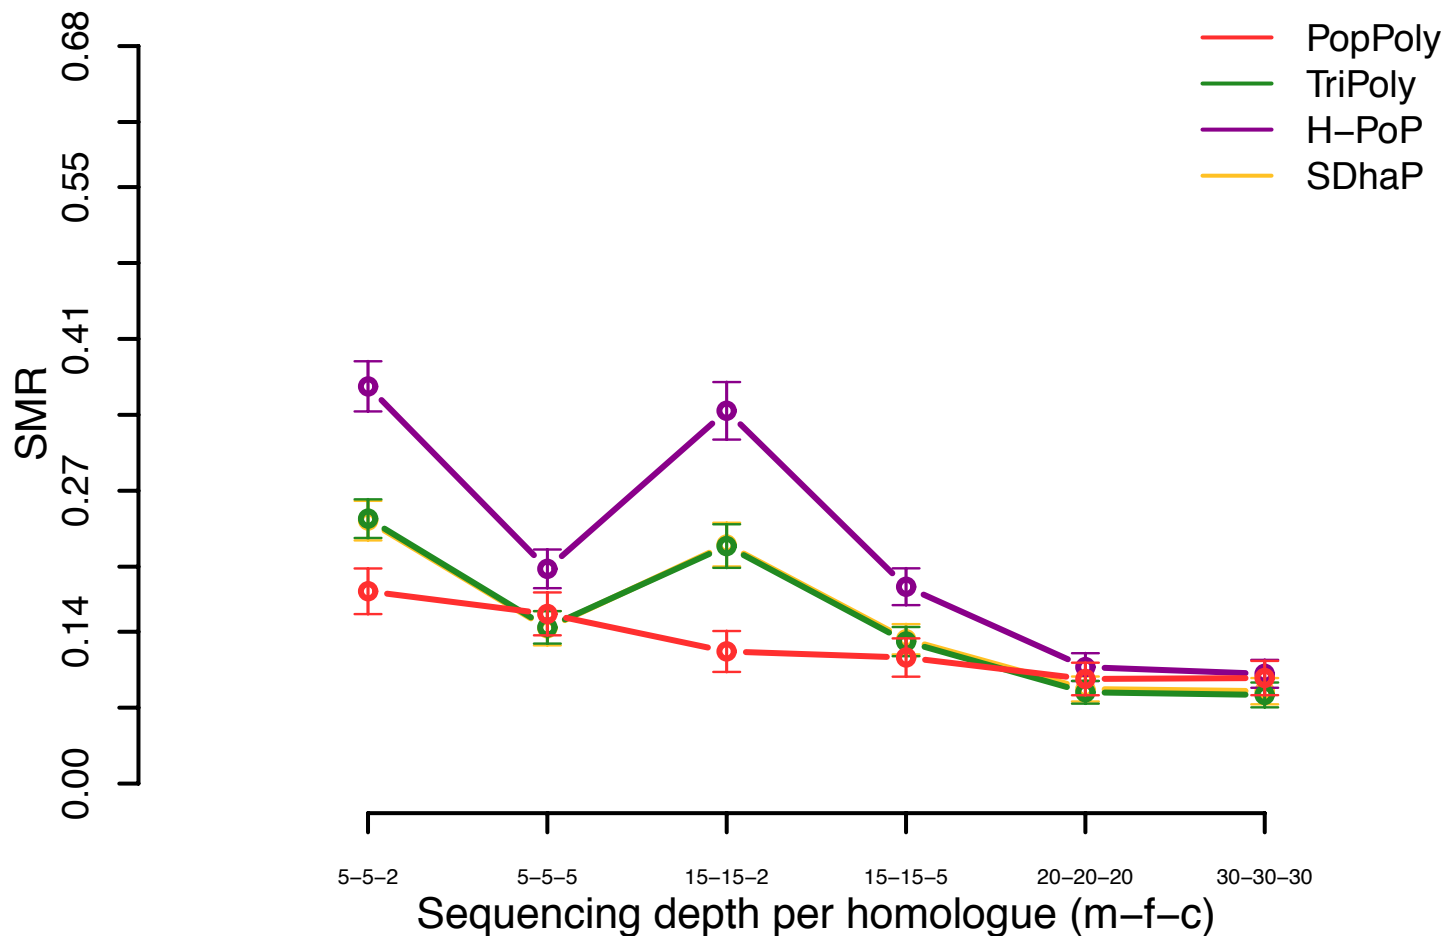

Figure S11

# SNP missing rate in population with 10 offspring

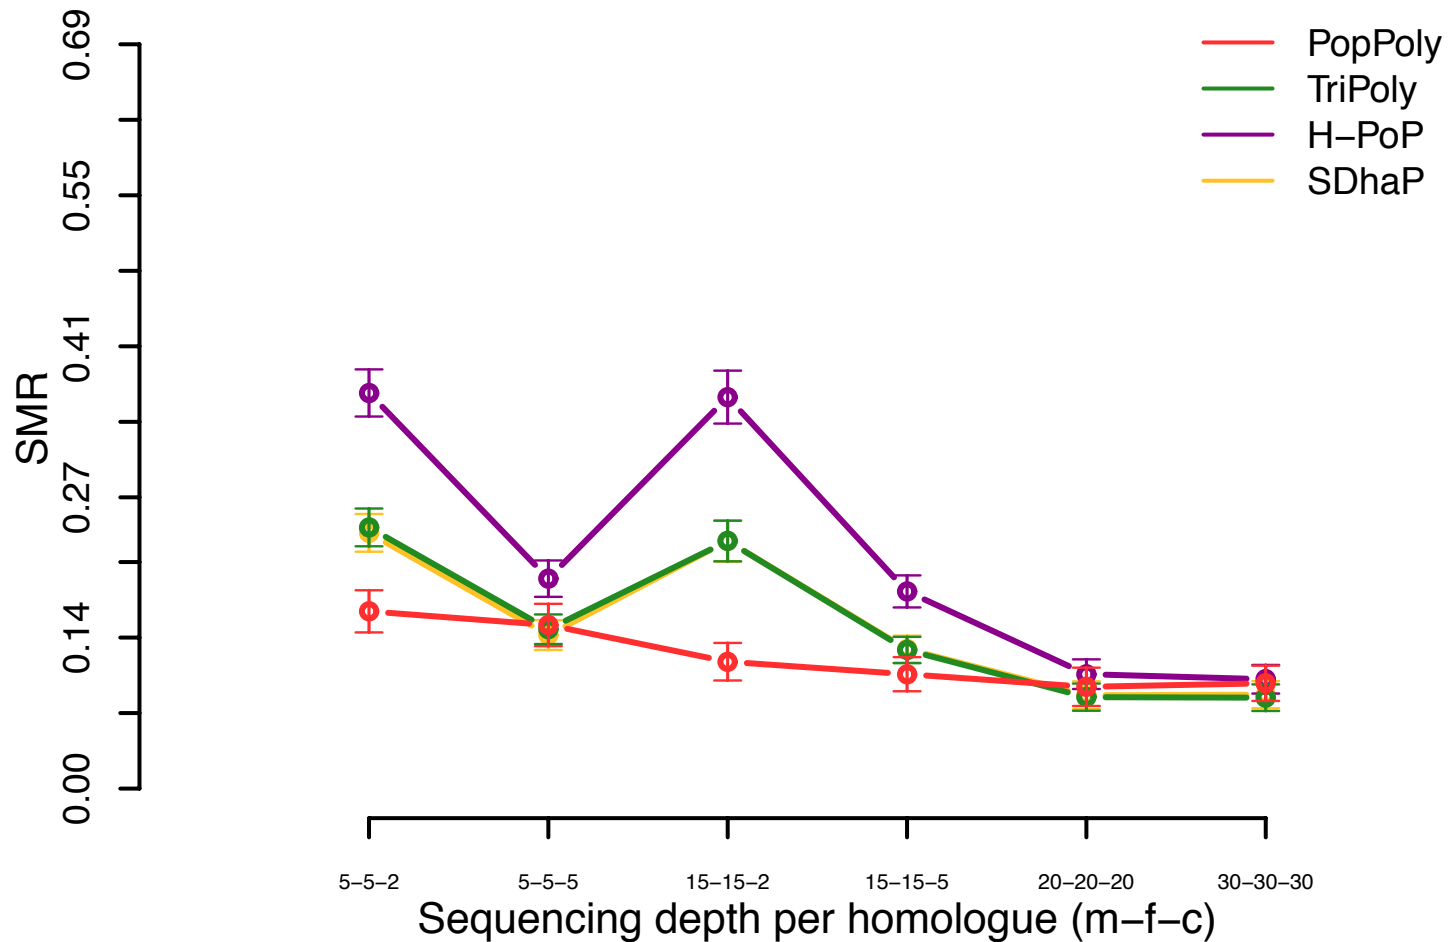

Figure S12

# Incorrect dosage rate in population with 2 offspring

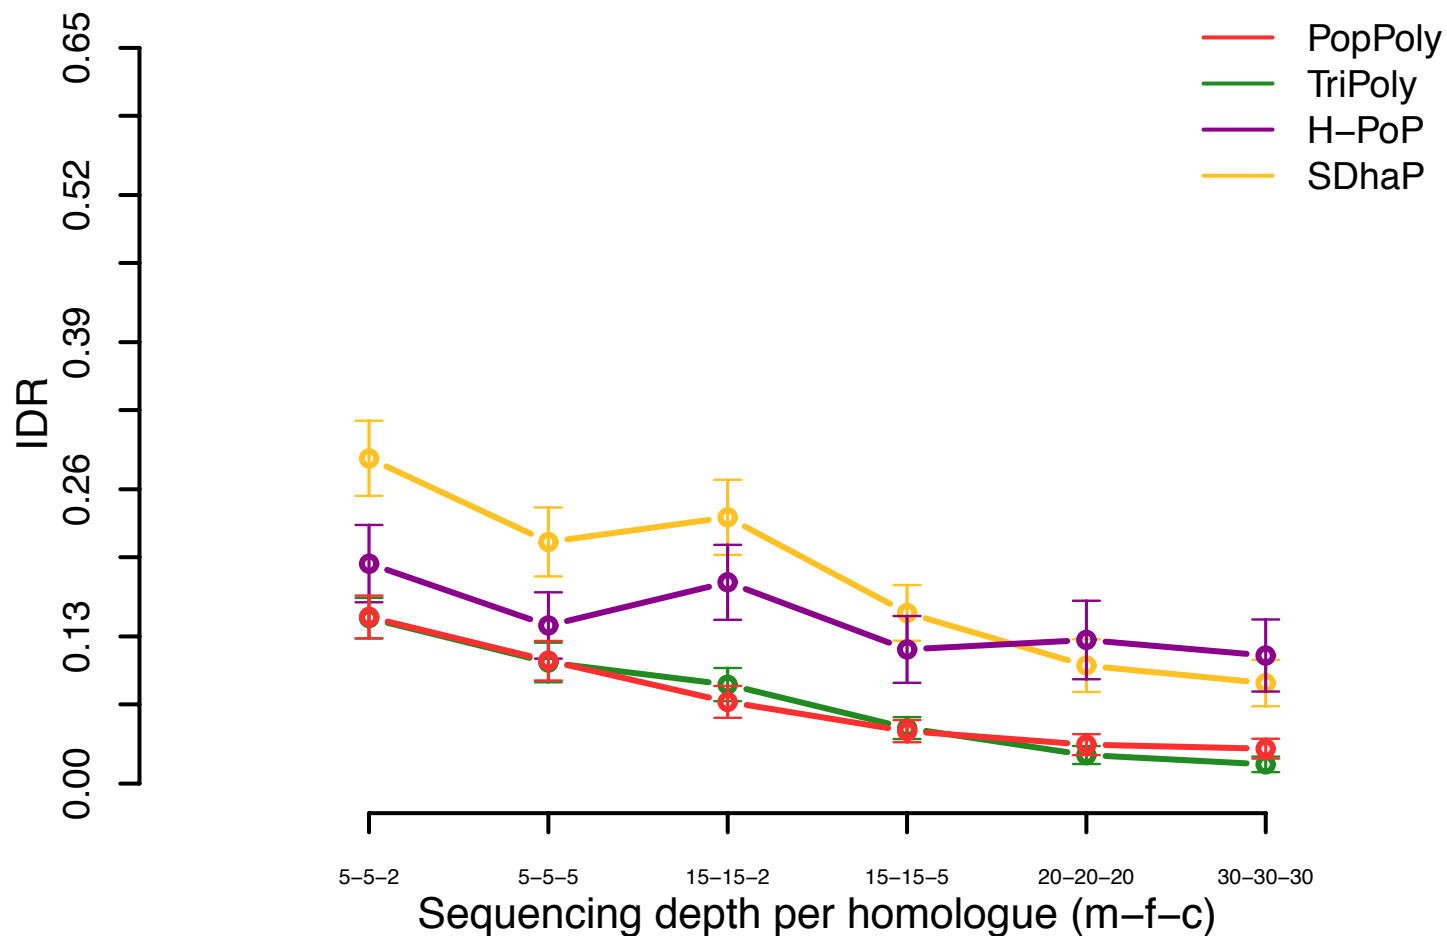

Figure S13

# Incorrect dosage rate in population with 6 offspring

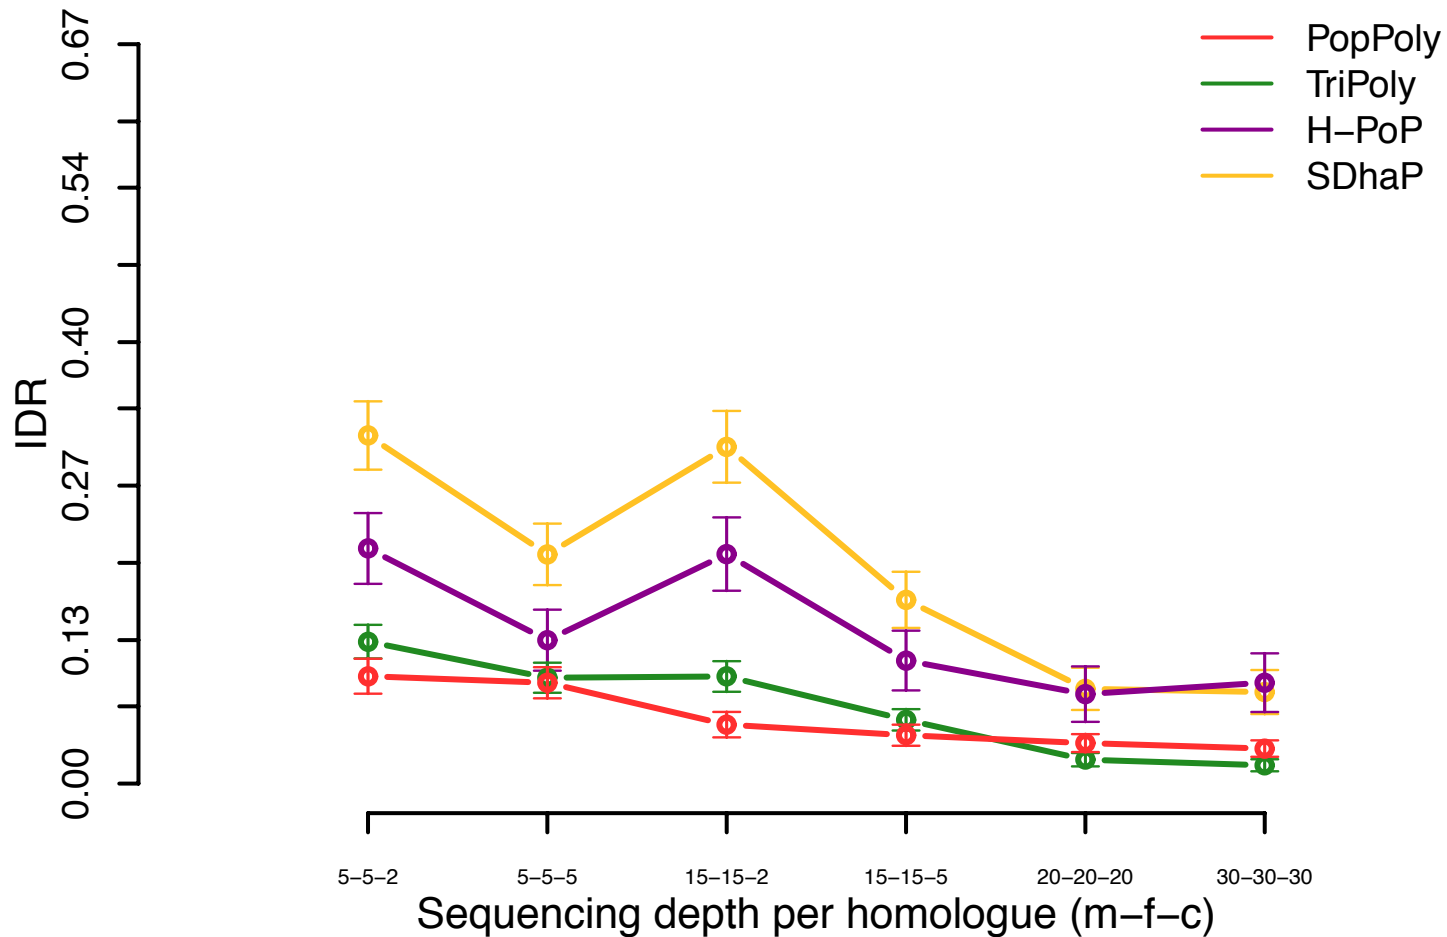

Figure S14

# Incorrect dosage rate in population with 10 offspring

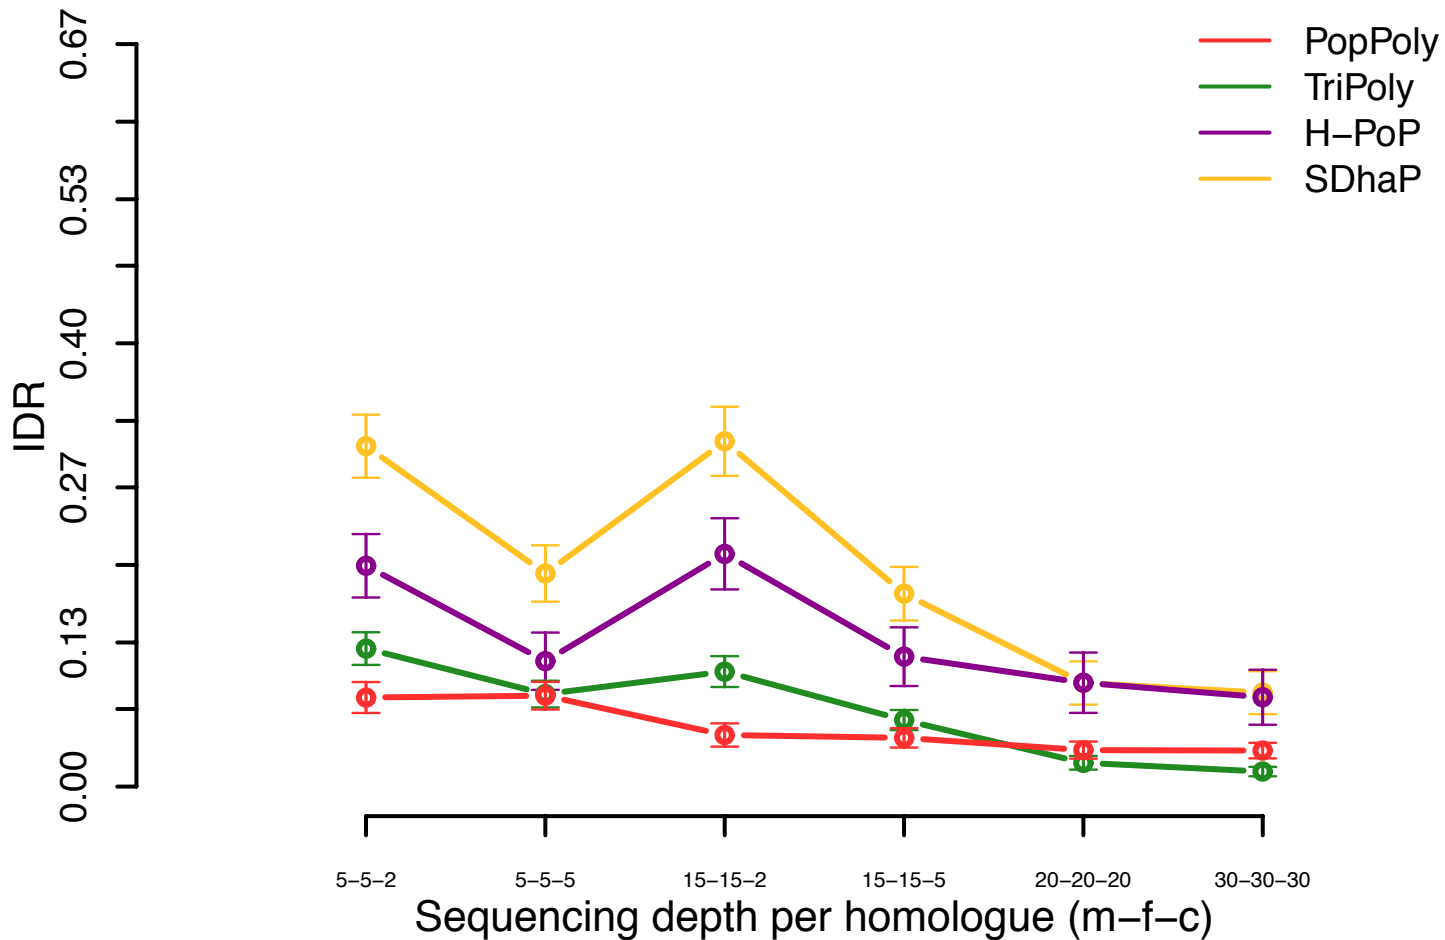

Figure S15

# Number of gaps per SNP in population with 2 offspring

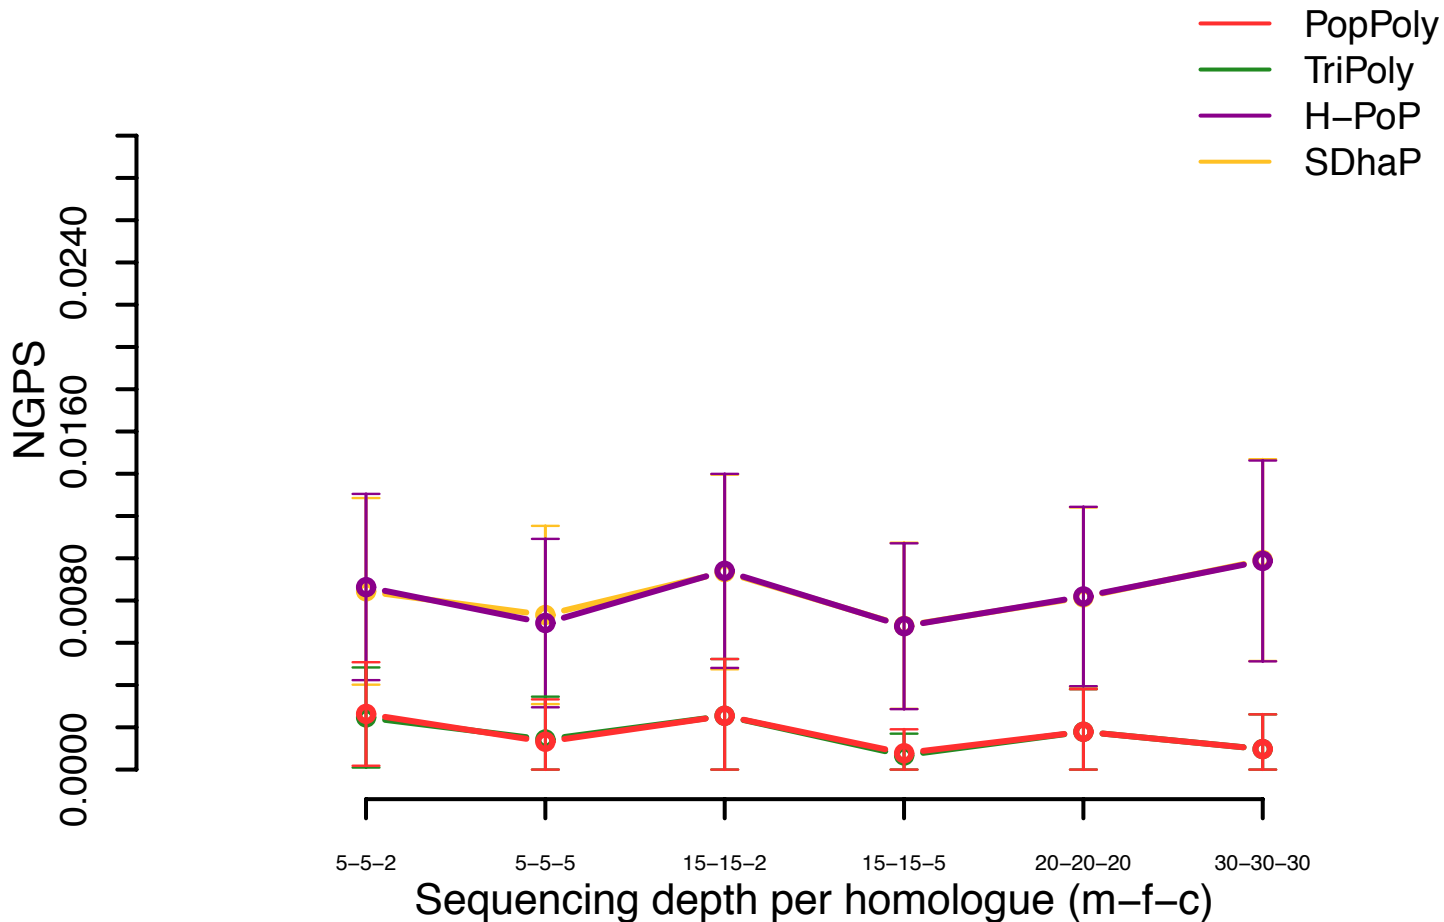

Figure S16

# Number of gaps per SNP in population with 6 offspring

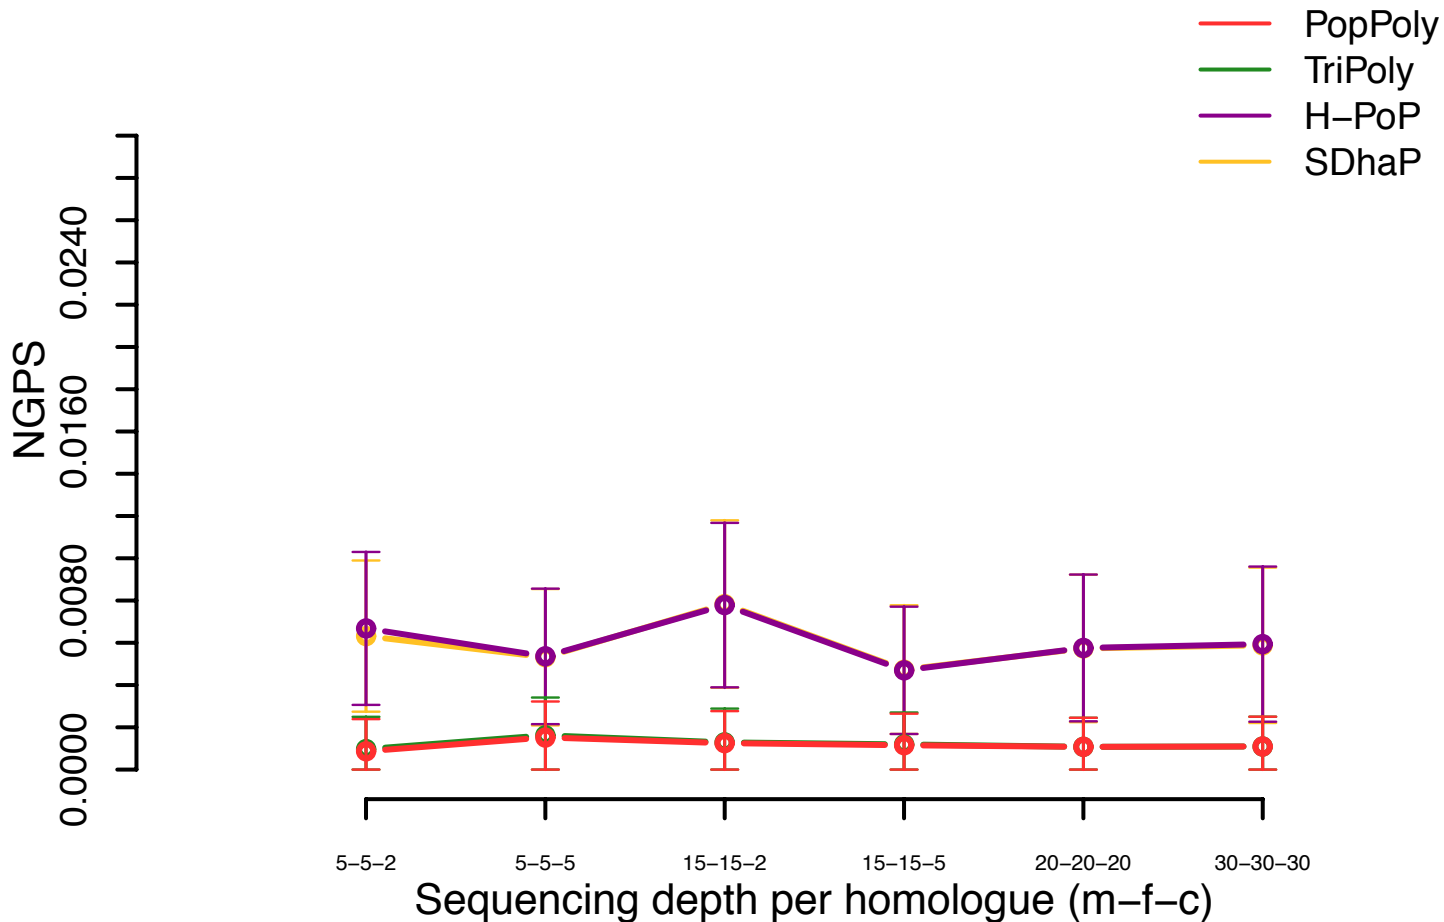



Figure S17

# Number of gaps per SNP in population with 10 offspring

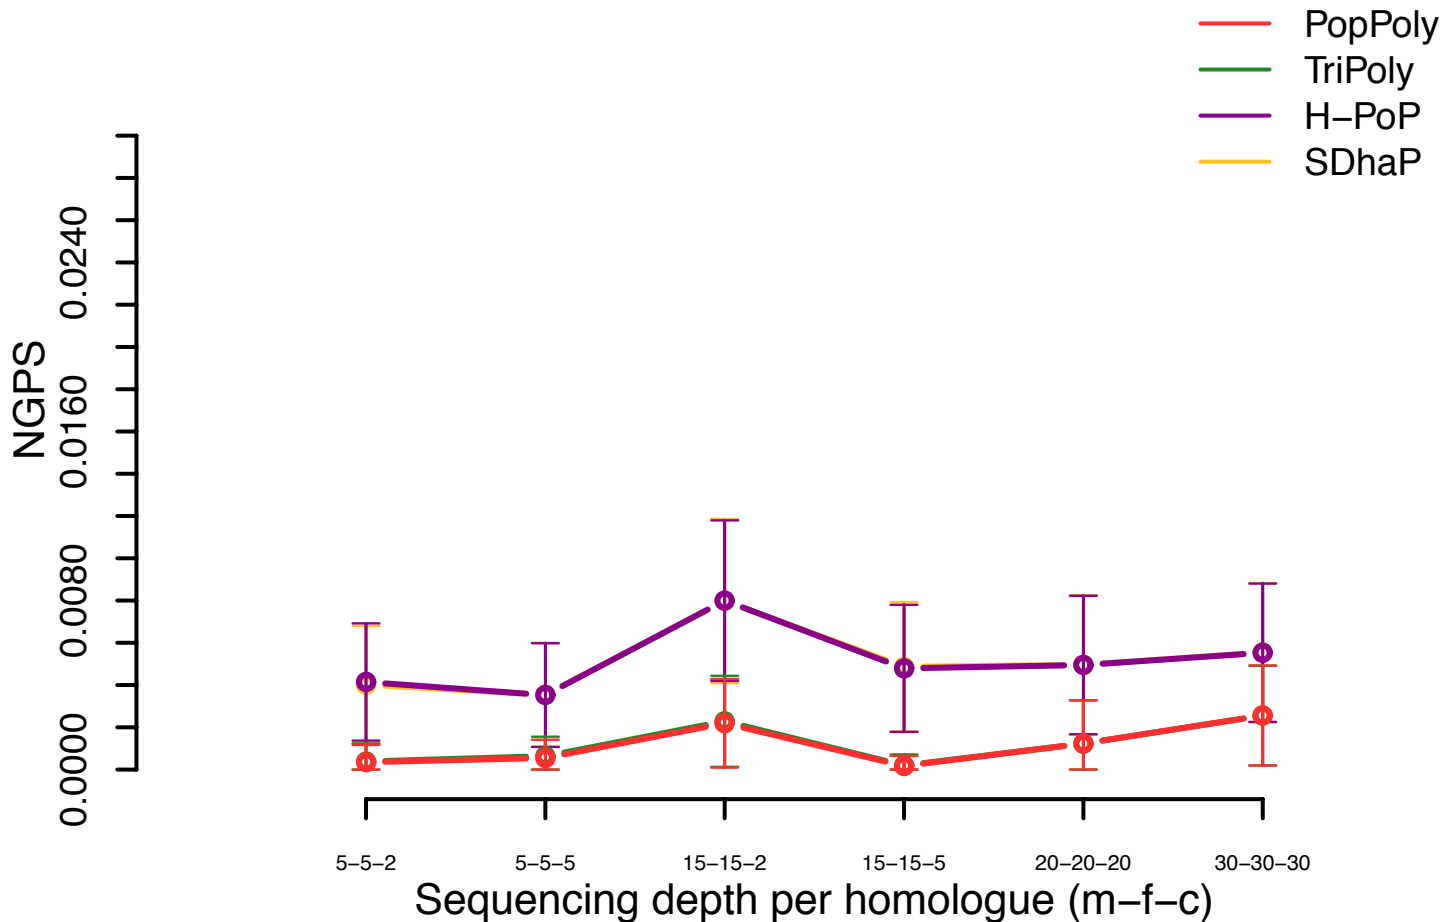

Figure S18

### PopPoly genotypes vs. KASP genotypes

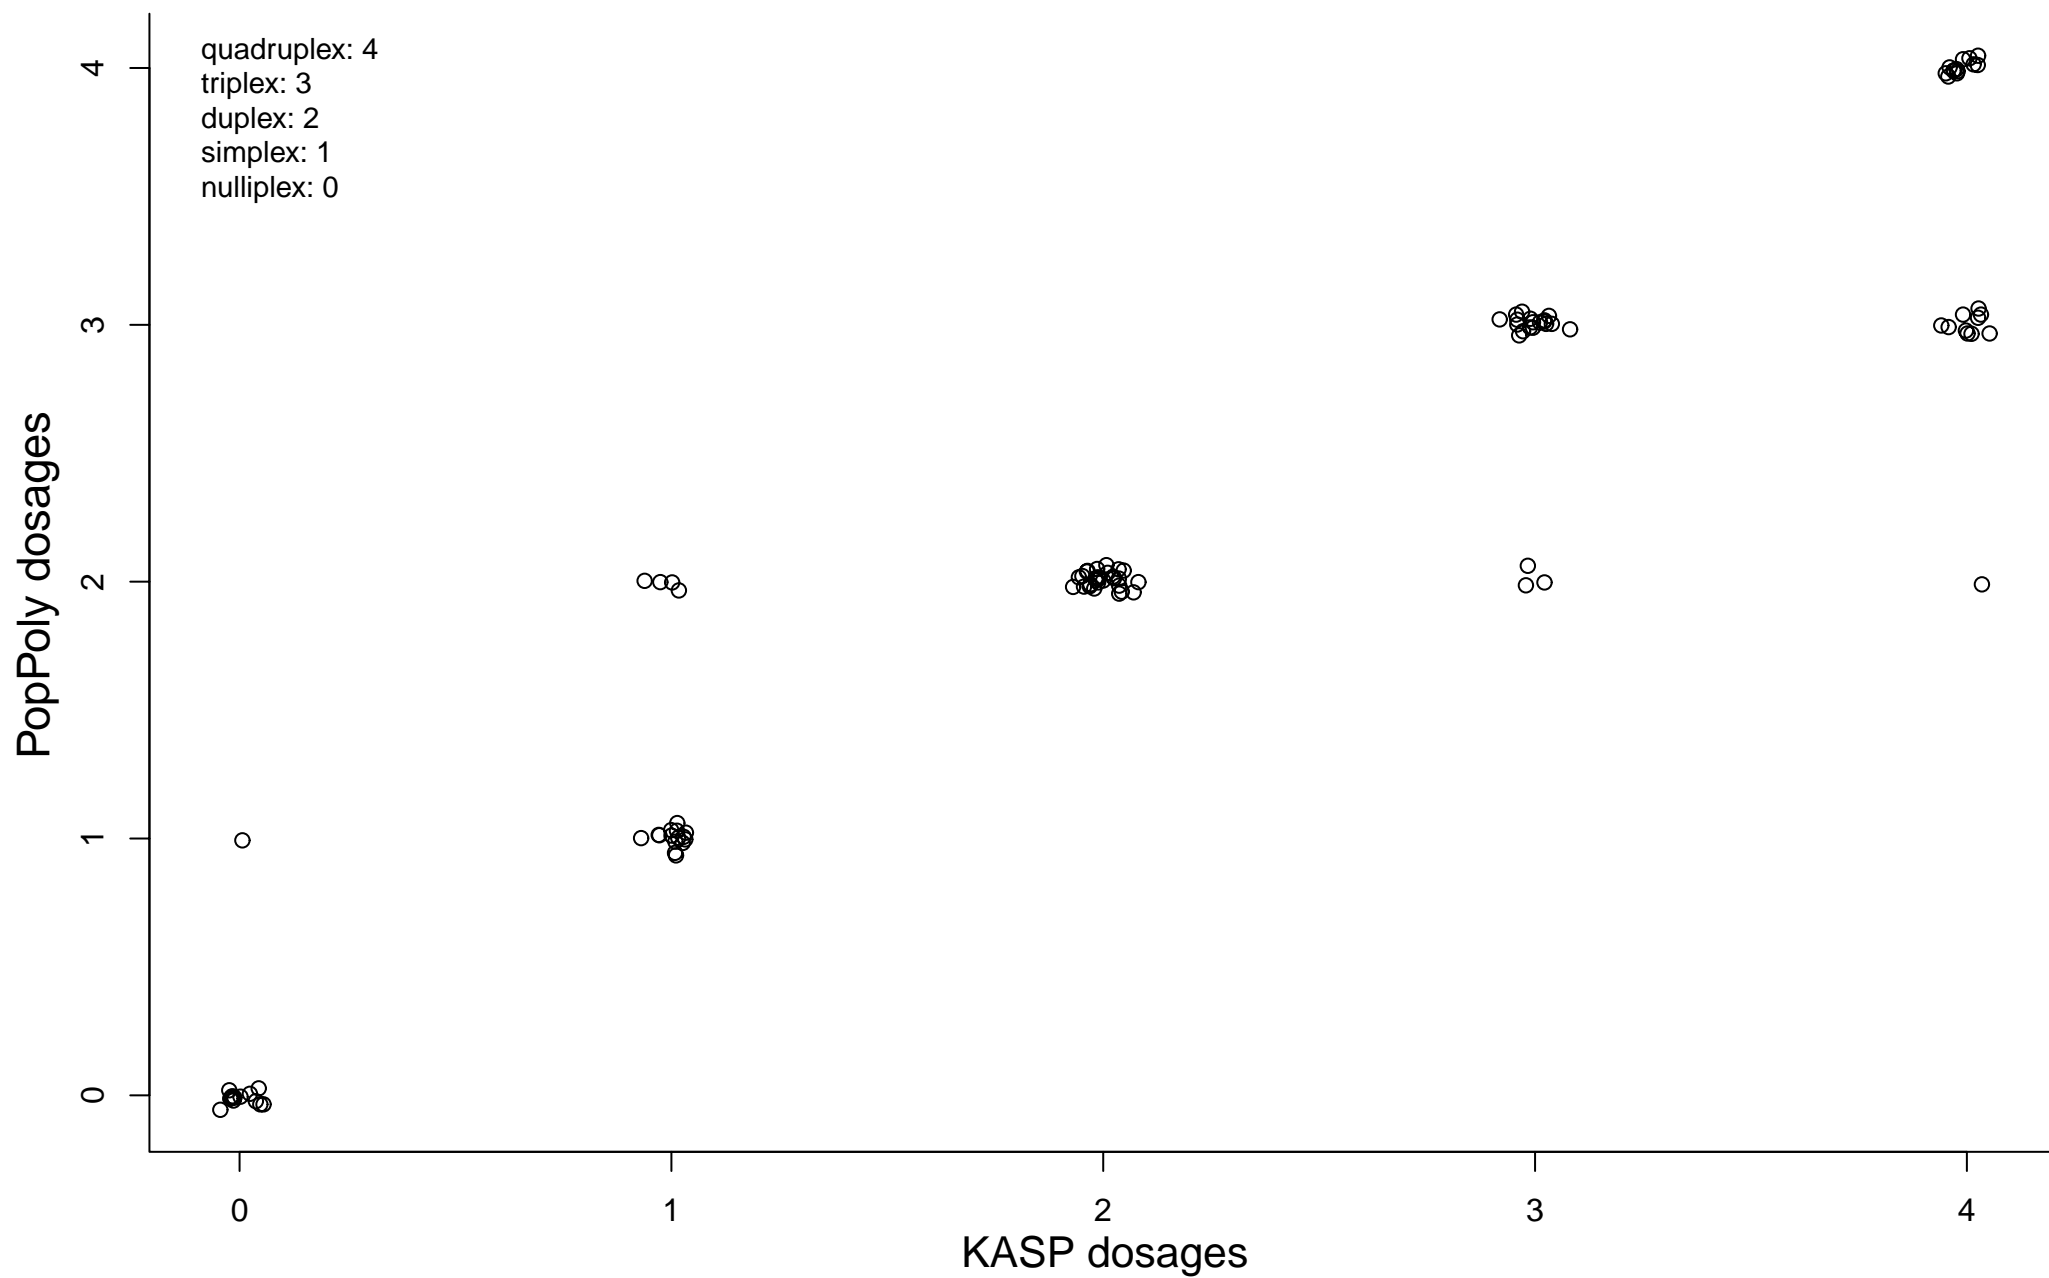

Supplement: Data_Sheet_5.pdf [file Data_Sheet_5.pdf]
